# Supplementary material
Source: ML conference proceedings conference paper supplement (https://openaccess.thecvf.com/content/CVPR2026/html/Li_Multi-Paradigm_Collaborative_Adversarial_CVPR_2026_paper.html)
Supplement: Supplementary file 1 [file Li_Multi-Paradigm_Collaborative_Adversarial_CVPR_2026_supplemental.pdf]

# Multi-Paradigm Collaborative Adversarial Attack Against Multi-Modal Large Language Models

## Supplementary Material

In this supplementary material, we provide the algorithm of the proposed MPCAttack, a detailed description of the dataset and evaluation prompt, the experimental results on the MME dataset, the ablation experiments for Multi-Paradigm, the parameter experiments of the loss function, and the visualization of the attack on adversarial examples on closed-source MLLMs.

### 7. A Detailed Algorithm of MPCAttack

The detailed description of the proposed MPCAttack is shown in Algorithm 1.

### 8. Detailed Datasets and Evaluation Prompt

**ImageNet.** The ImageNet dataset, which is the most commonly used dataset in the field of adversarial attacks, we adopt 1,000 images from the ImageNet subset used in the NIPS 2017 Adversarial Attacks and Defenses Competition following [25, 29].

**Flickr30K.** The Flickr30K dataset contains approximately 31,783 images collected from Flickr, and each image is accompanied by five natural language descriptions written by humans. As a commonly used multimodal dataset, it has ground truth captions. Therefore, we randomly select 1000 images along with their corresponding captions. During the generation of adversarial examples, we sequentially select source images and select target images in reverse order to produce the adversarial examples. During the evaluation phase, we directly use the ground truth captions as the source and target descriptions to compute similarity scores with the adversarial descriptions.

**MME.** The MME dataset provides a comprehensive benchmark for evaluating the multimodal understanding capabilities of large language models, where each sample contains a yes/no type question designed to directly reflect the accuracy of the model’s responses. It comprises 1,187 images, each paired with two questions corresponding to “yes” and “no” answers. During the generation of adversarial examples, we sequentially select source images and select target images in reverse order to produce the adversarial examples. During the evaluation phase, for targeted attacks, the adversarial examples are paired with the target image’s question and fed into the victim black-box MLLMs, which provide a yes or no answer; the attack is considered successful if the model’s response indicates misclassification. For untargeted attacks, the adversarial examples are paired with the source image’s question and similarly evaluated against the

---

#### Algorithm 1 MPCAttack

**Input:** Source image  $x_s$ , target image  $x_t$ , multi-paradigm image encoders  $f_{c_I}, f_m, f_v$ , multi-modal understanding text generator  $f_{mg}$ , cross-modal alignment text encoder  $f_{c_T}$ , loss function  $\mathcal{L}$ , weighting factor  $\lambda$ , image processing  $\mathcal{T}$ , perturbation budget  $\epsilon$ , iterations  $N$ , step size  $\alpha$ , momentum factor  $\mu$ .

**Output:** Adversarial image  $x_{adv}$ .

- 1: Initialize:  $x_{adv}^0 = x_s + \delta^0, g^0 = 0$ ; // Initialize adversarial image  $x_{adv}$  with random noise  $\delta^0$
  - 2: **for**  $n = 0$  to  $N - 1$  **do**
  - 3:  $\hat{x}_{adv}^n = \mathcal{T}(x_{adv}^n)$ ; // Perform random crop
  - 4: Get multi-paradigm aggregated features  $z_{adv}, z_s, z_t$  from  $\hat{x}_{adv}^n, x_s, x_t$  by Eq. (2), (3), (4), (5);
  - 5: Compute loss  $\mathcal{L}$  by Eq. (6);
  - 6:  $g^{n+1} = \mu \cdot g^n + \frac{\nabla \mathcal{L}}{\|\nabla \mathcal{L}\|}$ ;
  - 7:  $\delta^{n+1} = \text{Clip}(\delta^n + \alpha \cdot \text{sign}(g^{n+1}), -\epsilon, \epsilon)$ ;
  - 8:  $x_{adv}^{n+1} = x_{adv}^n + \delta^{n+1}$
  - 9: **end for**
  - 10: **return**  $x_{adv} = x_{adv}^N$
- 

victim black-box MLLMs. Notably, we only use the question corresponding to the “yes” answer for evaluation, as in practice we found that the “no” question often does not correspond to the associated image, making it incapable of reliably reflecting whether the adversarial sample successfully succeeds and thus unsuitable for a proper assessment.

**Evaluation prompt.** Following [25], we adopt the same way to evaluate the adversarial performance. Below is the detailed evaluation prompt used to assess semantic similarity between textual inputs. The “{text1}” and “{text2}” are used as placeholders for text inputs. The evaluation prompt template is shown in Figure 7.

### 9. Detailed Models

Table 5 lists the models used by each paradigm. Here, “main” indicates the primary model used, while “ablation” represents the other models employed in the ablation study in Figure 5. Because the current commonly used image encoders of MLLMs tend to be pre-trained models that are trained using the cross-modal alignment paradigm. Therefore, we mainly adopt the CLIP framework as the main paradigm and integrate three different-sized CLIP models.

### Evaluation Prompt

Rate the semantic similarity between the following two texts on a scale from 0 to 1.

**Criteria for similarity measurement:**

- Main Subject Consistency:** If both descriptions refer to the same key subject or object (e.g., a person, food, an event), they should receive a higher similarity score.
- Relevant Description:** If the descriptions are related to the same context or topic, they should also contribute to a higher similarity score.
- Ignore Fine-Grained Details:** Do not penalize differences in phrasing, sentence structure, or minor variations in detail. Focus on whether both descriptions fundamentally describe the same thing.
- Partial Matches:** If one description contains extra information but does not contradict the other, they should still have a high similarity score.
- Similarity Score Range:**
  - 1.0:** Nearly identical in meaning.
  - 0.8-0.9:** Same subject, with highly related descriptions.
  - 0.7-0.8:** Same subject, core meaning aligned, even if some details differ.
  - 0.5-0.7:** Same subject but different perspectives or missing details.
  - 0.3-0.5:** Related but not highly similar (same general theme but different descriptions).
  - 0.0-0.2:** Completely different subjects or unrelated meanings.

Text 1: {text1}

Text 2: {text2}

Output only a single number between 0 and 1. Do not include any explanation or additional text.

Figure 7. Evaluation prompt template.

Table 5. The models used by each paradigm.

|                                   |                                                                                                                                                                                                                                  |
|-----------------------------------|----------------------------------------------------------------------------------------------------------------------------------------------------------------------------------------------------------------------------------|
| Cross-Modal Alignment Paradigm    | clip-vit-base-patch16 (main)<br>clip-vit-base-patch32 (main)<br>CLIP-ViT-G-14-laion2B-s12B-b42K (main)<br>siglip2-base-patch16-224 (ablation)<br>siglip2-base-patch32-256 (ablation)<br>siglip2-giant-opt-patch16-256 (ablation) |
| Multimodal Understanding Paradigm | InternVL3-1B (main)<br>InternVL3-2B (ablation)                                                                                                                                                                                   |
| Visual Self-Supervised Paradigm   | dinov2-base(main)<br>dinov3-base (ablation)                                                                                                                                                                                      |

## 10. Experimental Results on MME dataset

Tables 6 and 7 present the attack success rates of different methods on both open-source and closed-source MLLMs. Across all settings, MPCAttack consistently delivers the highest ASR, demonstrating strong generalization in both targeted and untargeted attack scenarios. On open-source MLLMs, MPCAttack yields clear performance gains, particularly on InternVL3-8B and glm-4.1v-9b-thinking, where it surpasses FOA-Attack by large margins in both attack types. Its average ASR improves by 5.90% in targeted and 9.29% in untargeted settings, confirming the effectiveness of multi-paradigm collaborative optimization. On closed-source MLLMs, the superiority of MPCAttack is even more pronounced. It achieves the highest ASR on all models, outperforming FOA-Attack by 5.35% (targeted) and 6.22% (untargeted) on average. The improvements on challenging models such as GPT-

5 and Claude-4.5 indicate stronger transferability to unseen architectures with distinct training pipelines. The results demonstrate that MPCAttack enhances attack transferability across diverse model families, highlighting the advantage of aggregating multi-paradigm representations for globally optimized adversarial perturbations.

## 11. Attack performance under defense mechanisms and diverse settings

We evaluate our method under representative defense strategies (e.g., DiffPure) as well as diverse input conditions (e.g., additive noise). As shown in Table 8, MPCAttack largely preserves its attack effectiveness under these challenging settings. Moreover, compared with M-Attack and FOA-Attack, MPCAttack exhibits significantly less performance degradation when facing defense mechanisms and environmental variations, demonstrating its superior robustness.

## 12. Ablation Study for Multi-Paradigm

The results in Table 9 clearly demonstrate the effectiveness of incorporating the Multi-Paradigm mechanism. For both M-Attack and FOA-Attack, adding the Multi-Paradigm module consistently improves ASR and semantic similarity across all victim models in both targeted and untargeted settings. These gains indicate that integrating complementary paradigm-specific representations can enrich gradient signals and provide more coherent optimization guidance, thereby enhancing the overall attack strength. However, despite these improvements, the Multi-Paradigm-enhanced

variants still fall short of MPCAttack. This gap highlights an important limitation of directly extending existing methods: although they benefit from additional paradigms, their optimization remains largely independent across feature types. Such optimization can lead to redundant gradient directions, restricting their ability to fully leverage complementary information. In contrast, MPCAttack jointly optimizes multi-paradigm features in a unified framework, enabling coordinated gradient alignment and globally consistent perturbation updates. This integrated optimization yields more effective and transferable adversarial perturbations, outperforming all baselines by a clear margin.

### 13. Analysis of Loss-Function Parameter Effects

Since the loss function  $\mathcal{L}$  contains two parameters, where  $\tau$  is a temperature coefficient that controls the sharpness of the similarity distribution, and  $\omega$  is a balancing factor that regulates the trade-off between positive pairs and negative pairs. Table 10 evaluates the influence of the temperature coefficient  $\tau$  and the balancing factor  $\omega$  in the loss function. As  $\tau$  controls the sharpness of the similarity distribution, overly small values lead to unstable optimization and poor ASR, while excessively large values oversmooth the distribution and weaken contrastive guidance. Moderate values (e.g.,  $\tau=0.2-0.4$ ) achieve the best balance and yield consistently strong performance. Meanwhile,  $\omega$  regulates the trade-off between positive and negative pairs: small values overemphasize source separation and hinder targeted alignment, whereas overly large values bias the optimization toward positive pairs and reduce discriminability. Intermediate settings (e.g.,  $\omega=2-3$ ) provide the most effective trade-off.

### 14. Visualization

Figure 8 shows the description of commercial LVLMs for the adversarial images generated by SADCA. It can be seen that it is capable of effectively attacking various commercial MLLMs.

Table 6. Performance of ASR (%) on open-source MLLMs across both targeted and untargeted settings on MME dataset.

| Targeted         | Victim Black-box Open-Source Models |              |              |                      |              |
|------------------|-------------------------------------|--------------|--------------|----------------------|--------------|
|                  | Qwen2.5-VL-7B-Instruct              | InternVL3-8B | LLaVa-1.5-7B | glm-4.1v-9b-thinking | Average      |
| M-Attack         | 9.94                                | 44.23        | 35.38        | 34.46                | 31.00        |
| FOA-Attack       | 11.20                               | 47.09        | 36.98        | 38.50                | 33.44        |
| <b>MPCAttack</b> | <b>11.88</b>                        | <b>59.81</b> | <b>42.29</b> | <b>43.39</b>         | <b>39.34</b> |
| Untargeted       | Victim Black-box Open-Source Models |              |              |                      |              |
|                  | Qwen2.5-VL-7B-Instruct              | InternVL3-8B | LLaVa-1.5-7B | glm-4.1v-9b-thinking | Average      |
| M-Attack         | 26.20                               | 30.92        | 70.18        | 24.68                | 38.00        |
| FOA-Attack       | 26.20                               | 32.69        | 71.52        | 24.68                | 38.77        |
| <b>MPCAttack</b> | <b>31.84</b>                        | <b>45.32</b> | <b>83.49</b> | <b>31.59</b>         | <b>48.06</b> |

Table 7. Performance of ASR (%) on closed-source MLLMs across both targeted and untargeted settings on MME dataset.

| Targeted         | Victim Black-box Closed-Source Models |              |              |              |              |
|------------------|---------------------------------------|--------------|--------------|--------------|--------------|
|                  | GPT-4o                                | GPT-5        | Claude-3.5   | Gemini-2.0   | Average      |
| M-Attack         | 53.67                                 | 27.91        | 4.38         | 25.19        | 27.79        |
| FOA-Attack       | 55.91                                 | 30.13        | 6.97         | 31.06        | 31.02        |
| <b>MPCAttack</b> | <b>63.42</b>                          | <b>35.95</b> | <b>10.03</b> | <b>36.09</b> | <b>36.37</b> |
| Untargeted       | Victim Black-box Closed-Source Models |              |              |              |              |
|                  | GPT-4o                                | GPT-5        | Claude-3.5   | Gemini-2.0   | Average      |
| M-Attack         | 38.34                                 | 41.10        | 59.64        | 31.91        | 42.75        |
| FOA-Attack       | 38.50                                 | 39.91        | 60.13        | 32.17        | 42.68        |
| <b>MPCAttack</b> | <b>48.88</b>                          | <b>45.02</b> | <b>64.08</b> | <b>37.62</b> | <b>48.90</b> |

Table 8. The Average ASR (%) and AvgSim on four black-box open-source models under defense mechanisms and diverse settings.

|                  | DiffPure         |                  | Noisy            |                  |
|------------------|------------------|------------------|------------------|------------------|
|                  | Targeted         | ASR(↑) AvgSim(↑) | ASR(↑) AvgSim(↑) | ASR(↑) AvgSim(↓) |
| M-Attack         | 15.05            | 0.1656           | 27.75            | 0.2541           |
| FOA-Attack       | 17.43            | 0.1849           | 30.85            | 0.2831           |
| <b>MPCAttack</b> | <b>38.50</b>     | <b>0.3330</b>    | <b>50.85</b>     | <b>0.4136</b>    |
| Untargeted       | ASR(↑) AvgSim(↓) | ASR(↑) AvgSim(↓) | ASR(↑) AvgSim(↓) | ASR(↑) AvgSim(↓) |
| M-Attack         | 48.28            | 0.4410           | 59.23            | 0.3591           |
| FOA-Attack       | 53.73            | 0.4036           | 64.35            | 0.3272           |
| <b>MPCAttack</b> | <b>78.13</b>     | <b>0.2207</b>    | <b>83.03</b>     | <b>0.1742</b>    |

Table 9. Ablation study for Multi-Paradigm.

| Targeted                  | Victim Black-box Open-Source Models |               |              |               |              |               |                      |               |
|---------------------------|-------------------------------------|---------------|--------------|---------------|--------------|---------------|----------------------|---------------|
|                           | Qwen2.5-VL-7B                       |               | InternVL3-8B |               | LLaVa-1.5-7B |               | GLM-4.1V-9B-Thinking |               |
| Methods                   | ASR(↑)                              | AvgSim(↑)     | ASR(↑)       | AvgSim(↑)     | ASR(↑)       | AvgSim(↑)     | ASR(↑)               | AvgSim(↑)     |
| M-Attack                  | 17.3                                | 0.1919        | 68.1         | 0.5361        | 59.9         | 0.4954        | 31.0                 | 0.3118        |
| M-Attack+Multi-Paradigm   | 24.2                                | 0.2508        | 79.7         | 0.6117        | 69.6         | 0.5476        | 33.0                 | 0.3088        |
| FOA-Attack                | 20.0                                | 0.2222        | 72.3         | 0.5700        | 63.8         | 0.5162        | 38.3                 | 0.3522        |
| FOA-Attack+Multi-Paradigm | <b>32.7</b>                         | 0.3061        | 84.3         | 0.6454        | 72.9         | 0.5707        | 42.4                 | 0.3760        |
| <b>MPCAttack</b>          | 32.5                                | <b>0.3191</b> | <b>88.7</b>  | <b>0.6678</b> | <b>73.9</b>  | <b>0.5905</b> | <b>58.2</b>          | <b>0.4756</b> |
| Untargeted                | Victim Black-box Open-Source Models |               |              |               |              |               |                      |               |
|                           | Qwen2.5-VL-7B                       |               | InternVL3-8B |               | LLaVa-1.5-7B |               | GLM-4.1V-9B-Thinking |               |
| Methods                   | ASR(↑)                              | AvgSim(↓)     | ASR(↑)       | AvgSim(↓)     | ASR(↑)       | AvgSim(↓)     | ASR(↑)               | AvgSim(↓)     |
| M-Attack                  | 54.3                                | 0.3982        | 90.8         | 0.1417        | 94.9         | 0.0819        | 61.2                 | 0.3696        |
| M-Attack+Multi-Paradigm   | 67.9                                | 0.3179        | 96.3         | 0.0888        | 97.9         | 0.0527        | 59.2                 | 0.3730        |
| FOA-Attack                | 61.8                                | 0.3589        | 93.0         | 0.1204        | 96.3         | 0.0659        | 68.1                 | 0.3227        |
| FOA-Attack+Multi-Paradigm | 72.3                                | 0.2821        | 97.0         | 0.0790        | 98.2         | 0.0448        | 69.8                 | 0.2989        |
| <b>MPCAttack</b>          | <b>84.9</b>                         | <b>0.1919</b> | <b>99.1</b>  | <b>0.0341</b> | <b>99.3</b>  | <b>0.0186</b> | <b>85.1</b>          | <b>0.1825</b> |

Table 10. Parameter experiments of  $\tau$  and  $\omega$ .

| Targeted               | Victim Black-box Open-Source Models |                        |                   |                        |                   |                        |                      |                        |
|------------------------|-------------------------------------|------------------------|-------------------|------------------------|-------------------|------------------------|----------------------|------------------------|
|                        | Qwen2.5-VL-7B-Instruct              |                        | InternVL3-8B      |                        | LLaVa-1.5-7B      |                        | GLM-4.1V-9B-Thinking |                        |
| Methods                | ASR( $\uparrow$ )                   | AvgSim( $\uparrow$ )   | ASR( $\uparrow$ ) | AvgSim( $\uparrow$ )   | ASR( $\uparrow$ ) | AvgSim( $\uparrow$ )   | ASR( $\uparrow$ )    | AvgSim( $\uparrow$ )   |
| $\tau=0.05, \omega=2$  | 6.6                                 | 0.1306                 | 38.1              | 0.3895                 | 37.1              | 0.3541                 | 21.3                 | 0.2511                 |
| $\tau=0.1, \omega=2$   | 31.2                                | 0.3081                 | 89.7              | 0.6712                 | 75.1              | 0.5959                 | 60.1                 | 0.4842                 |
| $\tau=0.2, \omega=2$   | 31.7                                | 0.3051                 | 91.3              | 0.6929                 | 76.5              | 0.6016                 | 62.9                 | 0.4910                 |
| $\tau=0.3, \omega=2$   | 32.3                                | 0.3140                 | 90.9              | 0.6856                 | 77.6              | 0.6079                 | 59.8                 | 0.4934                 |
| $\tau=0.4, \omega=2$   | 32.1                                | 0.3054                 | 90.6              | 0.6860                 | 77.3              | 0.6072                 | 61.5                 | 0.4917                 |
| $\tau=0.5, \omega=2$   | 33.2                                | 0.3137                 | 90.5              | 0.6847                 | 76.7              | 0.6032                 | 61.2                 | 0.4893                 |
| $\tau=0.2, \omega=0.5$ | 11.9                                | 0.1620                 | 36.9              | 0.3748                 | 31.7              | 0.3256                 | 22.7                 | 0.2546                 |
| $\tau=0.2, \omega=1$   | 26.3                                | 0.2726                 | 82.5              | 0.6173                 | 68.3              | 0.5357                 | 53.8                 | 0.4430                 |
| $\tau=0.2, \omega=3$   | 34.1                                | 0.3100                 | 90.7              | 0.6855                 | 76.4              | 0.6058                 | 59.0                 | 0.4858                 |
| $\tau=0.2, \omega=4$   | 30.1                                | 0.2946                 | 89.8              | 0.6870                 | 76.6              | 0.6057                 | 59.2                 | 0.4771                 |
| $\tau=0.2, \omega=5$   | 14.8                                | 0.1878                 | 77.8              | 0.5854                 | 62.5              | 0.5094                 | 41.2                 | 0.3648                 |
| Untargeted             | Victim Black-box Open-Source Models |                        |                   |                        |                   |                        |                      |                        |
|                        | Qwen2.5-VL-7B-Instruct              |                        | InternVL3-8B      |                        | LLaVa-1.5-7B      |                        | GLM-4.1V-9B-Thinking |                        |
| Methods                | ASR( $\uparrow$ )                   | AvgSim( $\downarrow$ ) | ASR( $\uparrow$ ) | AvgSim( $\downarrow$ ) | ASR( $\uparrow$ ) | AvgSim( $\downarrow$ ) | ASR( $\uparrow$ )    | AvgSim( $\downarrow$ ) |
| $\tau=0.05, \omega=2$  | 75.8                                | 0.2525                 | 98.7              | 0.0440                 | 99.4              | 0.0282                 | 78.0                 | 0.2464                 |
| $\tau=0.1, \omega=2$   | 86.6                                | 0.1775                 | 99.3              | 0.0322                 | 99.5              | 0.0195                 | 86.3                 | 0.1665                 |
| $\tau=0.2, \omega=2$   | 83.6                                | 0.1836                 | 99.1              | 0.0332                 | 99.3              | 0.0209                 | 87.7                 | 0.1620                 |
| $\tau=0.3, \omega=2$   | 85.5                                | 0.1847                 | 99.6              | 0.0306                 | 99.5              | 0.0188                 | 86.7                 | 0.1621                 |
| $\tau=0.4, \omega=2$   | 84.6                                | 0.1886                 | 99.4              | 0.0304                 | 99.6              | 0.0186                 | 86.5                 | 0.1688                 |
| $\tau=0.5, \omega=2$   | 86.4                                | 0.1812                 | 99.6              | 0.0316                 | 99.4              | 0.0198                 | 88.6                 | 0.1610                 |
| $\tau=0.2, \omega=0.5$ | 90.3                                | 0.1447                 | 99.8              | 0.0148                 | 99.6              | 0.0111                 | 87.8                 | 0.1632                 |
| $\tau=0.2, \omega=1$   | 86.4                                | 0.1623                 | 99.8              | 0.0221                 | 99.8              | 0.0147                 | 90.1                 | 0.1486                 |
| $\tau=0.2, \omega=3$   | 83.7                                | 0.2034                 | 99.1              | 0.0386                 | 99.5              | 0.0207                 | 85.7                 | 0.1799                 |
| $\tau=0.2, \omega=4$   | 80.8                                | 0.2207                 | 99.2              | 0.0407                 | 99.1              | 0.0243                 | 83.4                 | 0.1981                 |
| $\tau=0.2, \omega=5$   | 69.3                                | 0.2974                 | 98.9              | 0.0549                 | 99.3              | 0.0295                 | 74.9                 | 0.2625                 |

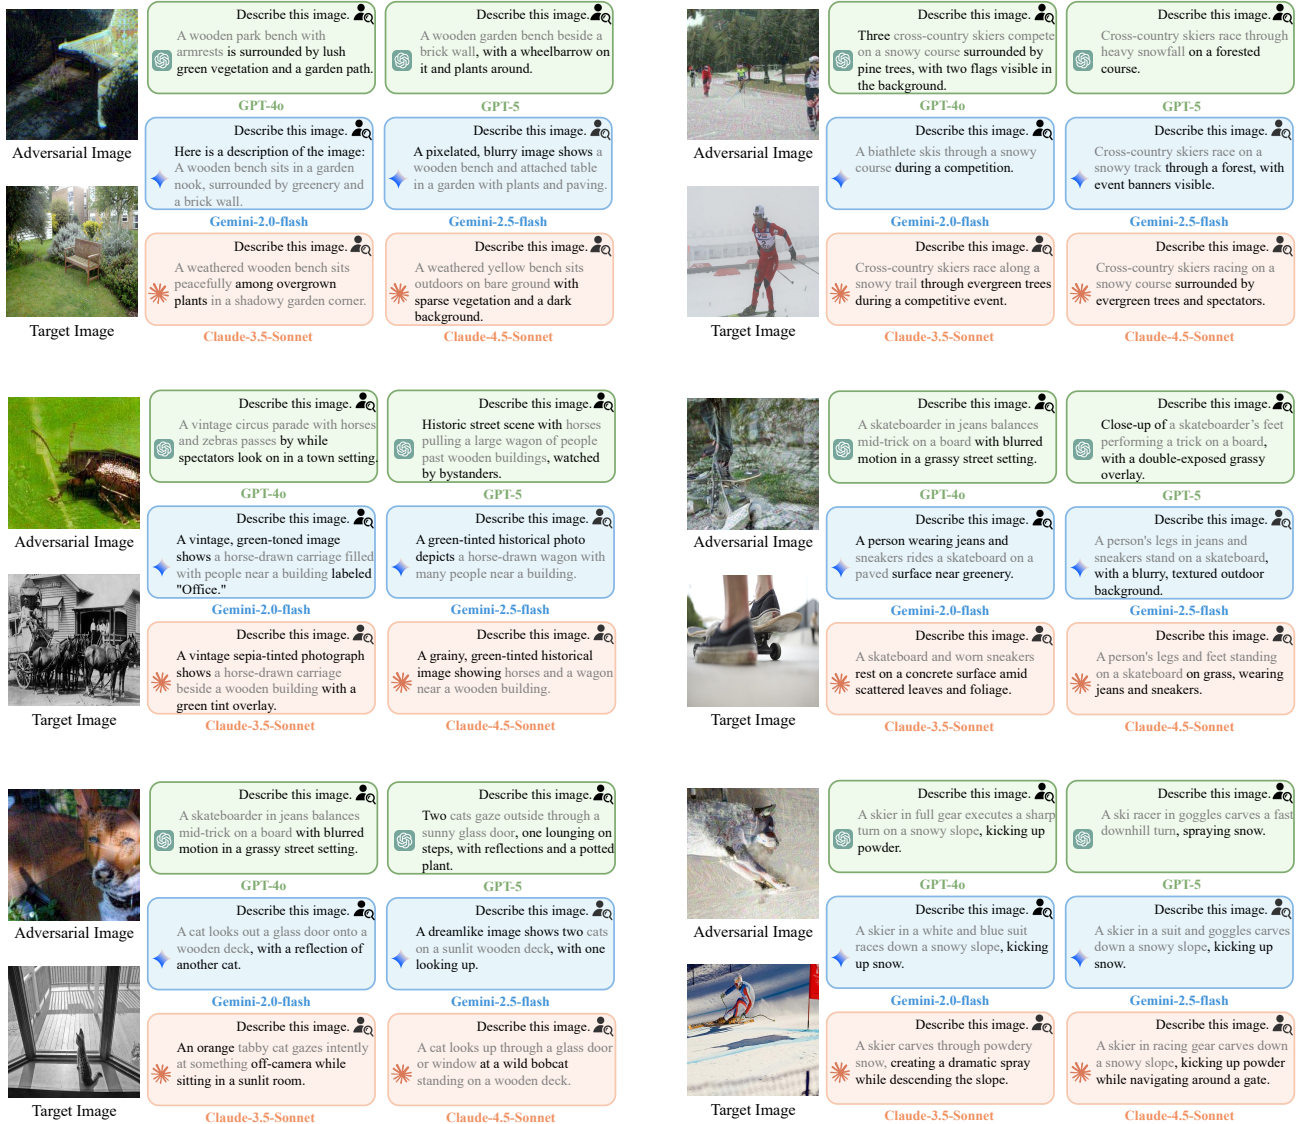

Figure 8. Visualization of adversarial images in attacking commercial MLLMs.
